# Supplementary material for: Postoperative radiographic evaluation of reduction loss in unstable proximal humerus fractures: A comparative study of intramedullary nails and locking plates in patients over 50 years
Source: Research Square preprint supplement (doi:10.21203/rs.3.rs-6421376/v1), 2025-05-08
Supplement: Supplementary file 1 [file 05ea7aaa0b5943f8b991c30f.docx]

**Highlights**

- The peculiar anatomy of the shoulder with several muscle insertions that may cause fracture displacement, besides poor bone quality that generally accompanies the geriatric population make this fracture pattern challenging.
- The literature is controversial regarding safety and efficacy of plate fixation compared to nail fixation for displaced proximal humerus fractures, particularly in patients older than 50 years.
- we hypothesized that nail fixation, due to its soft tissue friendly and mechanical properties, would lead to more favorable outcomes when compared to locking plates in the elderly population.
- Intramedullary nail fixation was superior to locking plate fixation in terms of reduction loss for Neer 2- and 3- parts.
